# Supplementary material for: Knee Osteoarthritis Pain Management with an Innovative High and Low Molecular Weight Hyaluronic Acid Formulation (HA-HL): A Randomized Clinical Trial
Source: PubMed Central journal article supplement — Rheumatol Ther. 2021 Aug 30;8(4):1617–36. doi: 10.1007/s40744-021-00363-3 (PMC8572249; doi:10.1007/s40744-021-00363-3), 2021-08-30
Supplement: 40744_2021_363_MOESM1_ESM.pdf [file 40744_2021_363_MOESM1_ESM.pdf]

## LIST OF INSTITUTIONAL ETHICS COMMITTEES OR INDEPENDENT REVIEW BOARDS

(Note: Some Ethics Committees were responsible for more than one Study Site)

|                                                                                                                                                                                                                                            |
|--------------------------------------------------------------------------------------------------------------------------------------------------------------------------------------------------------------------------------------------|
| Comité d'Ethique Hospitalo-Facultaire Universitaire de Liege, CHU Sart Tilman<br>Domaine Universitaire du Sart Tilman, B35, B/4000 Liège 1, Belgium                                                                                        |
| Sächsische Landesärztekammer<br>Körperschaft des öffentlichen Rechts, Ethikkommission, Schützenhöhe 16, PF 100465, 01099<br>Dresden, Germany                                                                                               |
| Ethikkommission an der Medizinischen Fakultät der Univesität Rockstock, Univesität Rockstock<br>PF 100888, 18055 Rockstock, Germany                                                                                                        |
| Egészségügyi Tudományos Tanács, Tudományos és Kutatásetikai Bizottság = TUKEB (Medical Research Council)<br>Mailing address: 7-8 Széchenyi István tér, Budapest, H-1051, Hungary<br>Location: 25 Alkotmány utca, Budapest, H-1054, Hungary |
| Egészségügyi Tudományos Tanács, Tudományos és Kutatásetikai Bizottság = TUKEB (Medical Research Council)<br>Mailing address: 7-8 Széchenyi István tér, Budapest, H-1051, Hungary<br>Location: 25 Alkotmány utca, Budapest, H-1054, Hungary |
| Egészségügyi Tudományos Tanács, Tudományos és Kutatásetikai Bizottság = TUKEB (Medical Research Council)<br>Mailing address: 7-8 Széchenyi István tér, Budapest, H-1051, Hungary<br>Location: 25 Alkotmány utca, Budapest, H-1054, Hungary |
| Egészségügyi Tudományos Tanács, Tudományos és Kutatásetikai Bizottság = TUKEB (Medical Research Council)<br>Mailing address: 7-8 Széchenyi István tér, Budapest, H-1051, Hungary<br>Location: 25 Alkotmány utca, Budapest, H-1054, Hungary |
| Egészségügyi Tudományos Tanács, Tudományos és Kutatásetikai Bizottság = TUKEB (Medical Research Council)<br>Mailing address: 7-8 Széchenyi István tér, Budapest, H-1051, Hungary<br>Location: 25 Alkotmány utca, Budapest, H-1054, Hungary |
| Egészségügyi Tudományos Tanács, Tudományos és Kutatásetikai Bizottság = TUKEB (Medical Research Council)<br>Mailing address: 7-8 Széchenyi István tér, Budapest, H-1051, Hungary<br>Location: 25 Alkotmány utca, Budapest, H-1054, Hungary |
| Comitato Etico Milano Area 2<br>Fondazione IRCCS Cà Granda Ospedale Maggiore Policlinico, Via Sforza 28, 20122 Milano, Italy                                                                                                               |
| Comitato Etico Università degli Studi della Campania “Luigi Vanvitelli”, AORN– “Ospedali dei Colli”<br>Via Santa Maria di Costantinopoli, 104, 80138 Napoli, Italy                                                                         |
| Comitato Etico, Lazio I“<br>A.O. San Camillo Fornalini, Circonvallazione Gianicolense 87, 00152 Roma, Italy                                                                                                                                |
| Komisja Bioetyczna przy Okręgowej Izbie Lekarskiej w Lublinieul. Chmielna 4, 20-079 Lublin,<br>Poland                                                                                                                                      |
